# Supplementary material for: Application of green synthesis of gold nanoparticles for sensitive detection of aflatoxin B1 based on metal enhanced fluorescence
Source: Royal Society of Chemistry journal article supplement (doi:10.1039/c2ay25979f), 2012-01-01

## Supplementary material

### **Application of green synthesis of gold nanoparticles for sensitive detection of Aflatoxin B1 based on metal enhanced fluorescence.**

.

Kunhitlu S. Abhijith and Munna S. Thakur\*

Fermentation technology & Bioengineering Department

CSIR- Central Food Technological Research Institute

(A constituent laboratory of Council of Scientific and Industrial Research, New Delhi),

Mysore-570020,

India

\* Corresponding author

M.S. Thakur, Ph.D.

Senior scientist

Fermentation technology & Bioengineering Department

CSIR- Central Food Technological Research Institute, Mysore-570020, India

[msthakur@cftri.res.in](mailto:msthakur@cftri.res.in), [msthakur@yahoo.com](mailto:msthakur@yahoo.com)

**Fig S1.** UV- visible spectrum of biologically synthesized GNPs showing maximum plasmon absorption at 530-535 nm

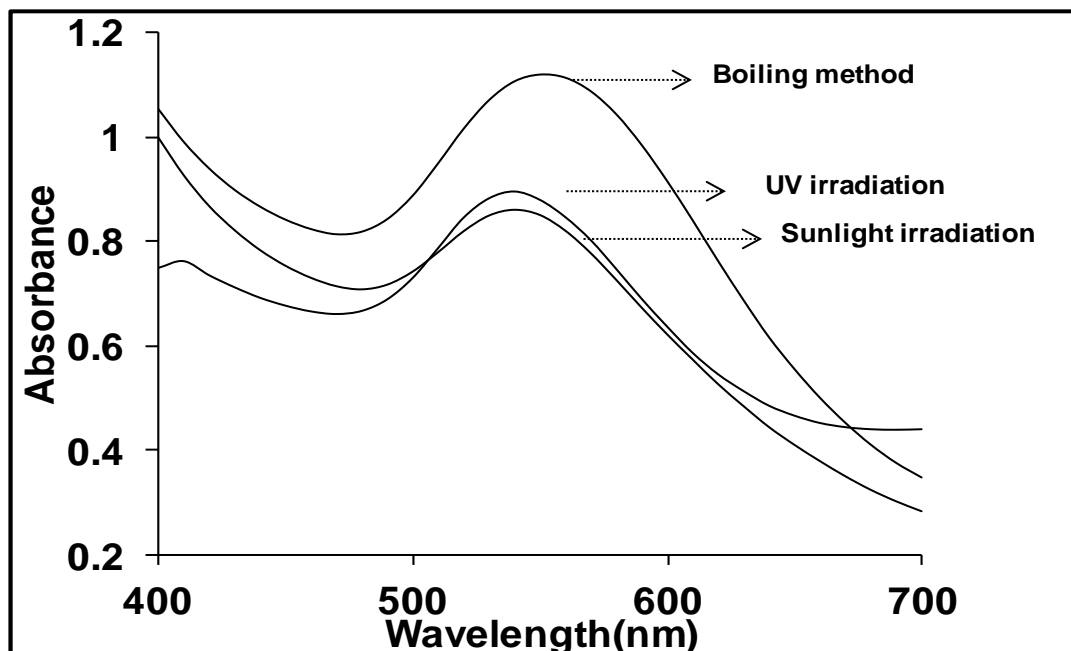

**Fig S2.** A&B FTIR spectra of citrate capped GNPs and biologically synthesized GNPs revealing the presence of characteristic functional moieties

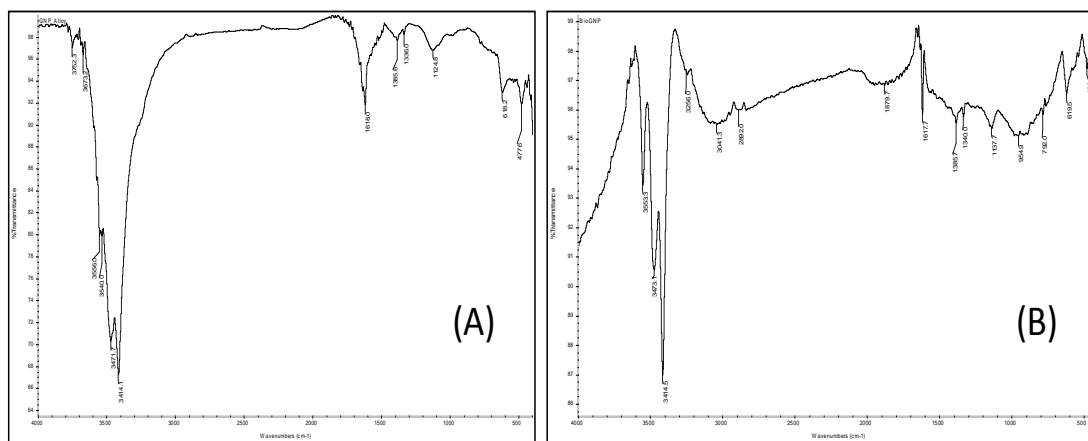

**Fig S3:** Effect of BGNPs on antibody fluorescence

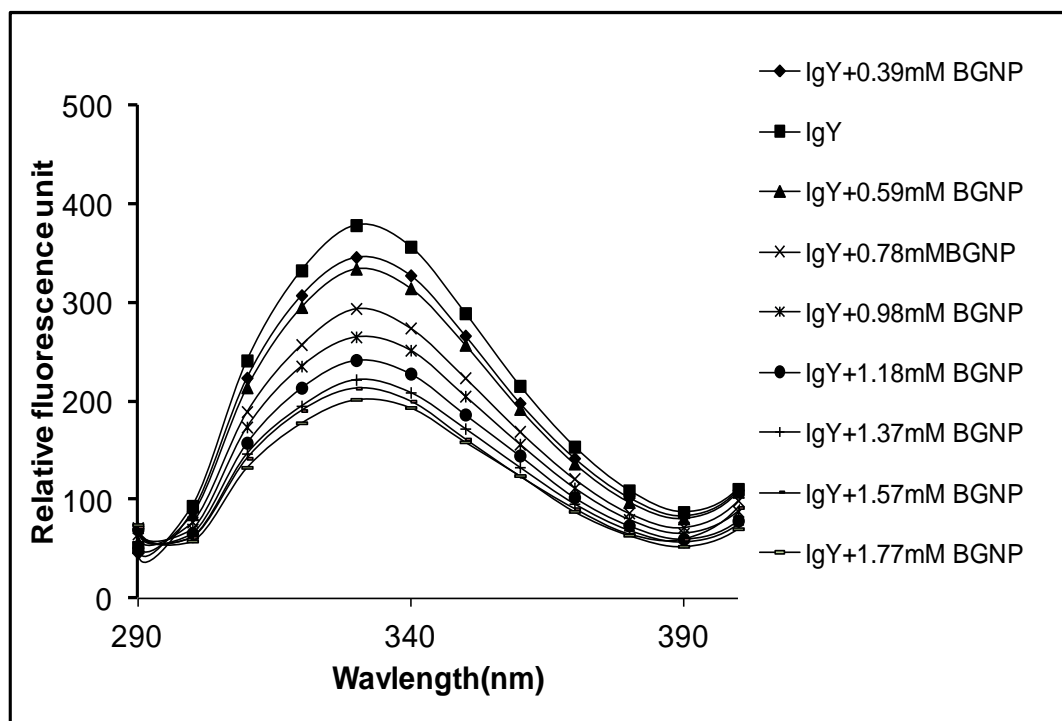

Supplement: c2ay25979f.pdf [file c2ay25979f.pdf]
